# Supplementary figures and images for: GWAS-based pathway analysis differentiates between fluid and crystallized intelligence
Source: PubMed Central journal article supplement — Genes Brain Behav. 2014 Aug 8;13(7):663–74. doi: 10.1111/gbb.12152 (PMC4261989; doi:10.1111/gbb.12152), 2014-08-08

**Figure S1**

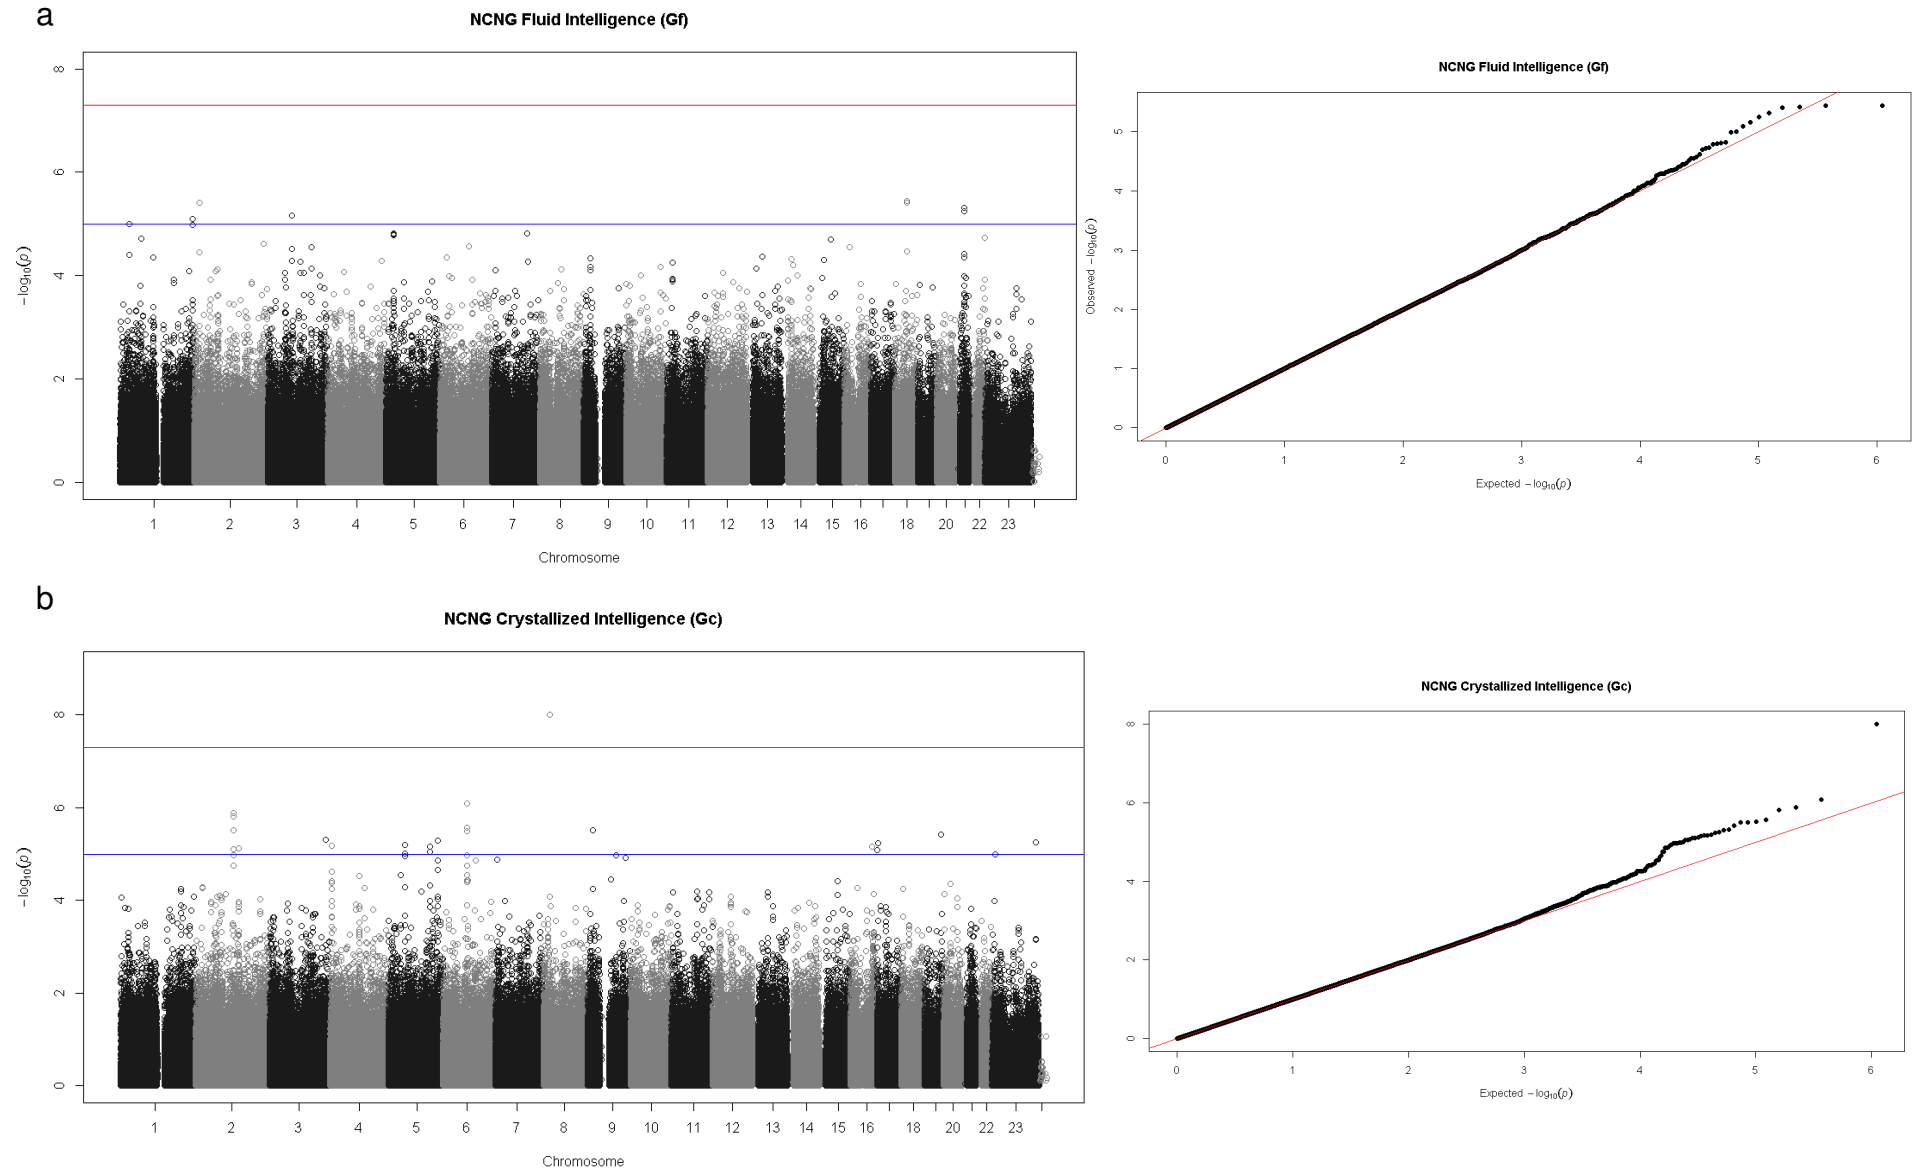

Supplement: gbb0013-0663-SD2.pdf [file gbb0013-0663-SD2.pdf]

Figure S2

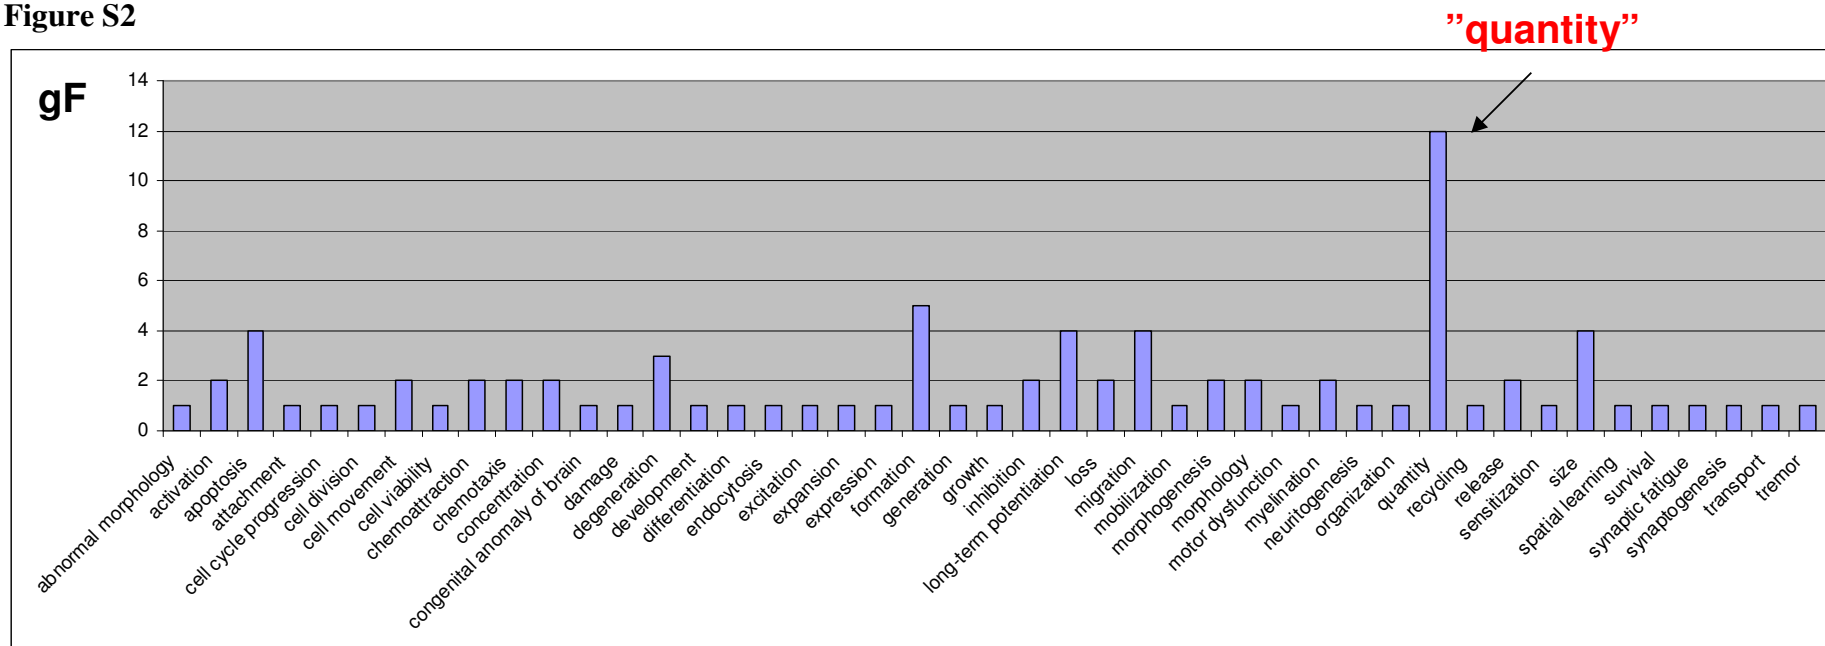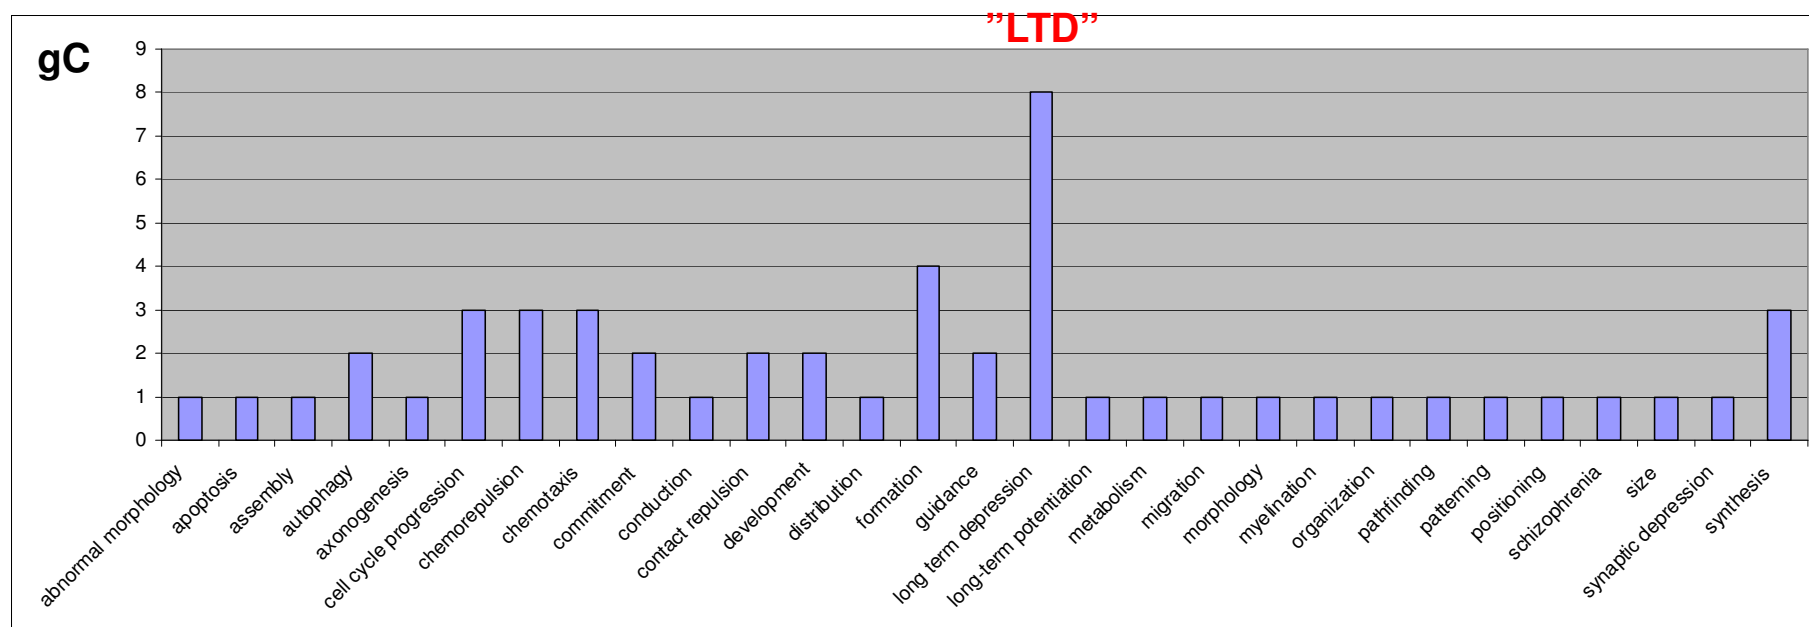

Supplement: gbb0013-0663-SD3.pdf [file gbb0013-0663-SD3.pdf]
